# Supplementary material for: Laboratory observations on meltwater meandering rivulets on ice
Source: Copernicus journal article supplement (doi:10.5194/esurf-2020-90), 2020-10-31
Supplement: Supplementary file 1 [file esurf-2020-90-supplement.zip]

Archive with 2 entries (2 files):
- S1 Methodology.pdf
- S2 Channels.pdf
