# Supplementary material for: Laboratory observations on meltwater meandering rivulets on ice
Source: Copernicus journal article supplement (doi:10.5194/esurf-2020-90), 2020-10-31
Supplement: Supplementary file 1 [file esurf-2020-90-supplement.zip › S2 Channels.pdf]

S2. Images showing digitized centerlines for the mm-scale experiments, and the Peterman Ice Island image.

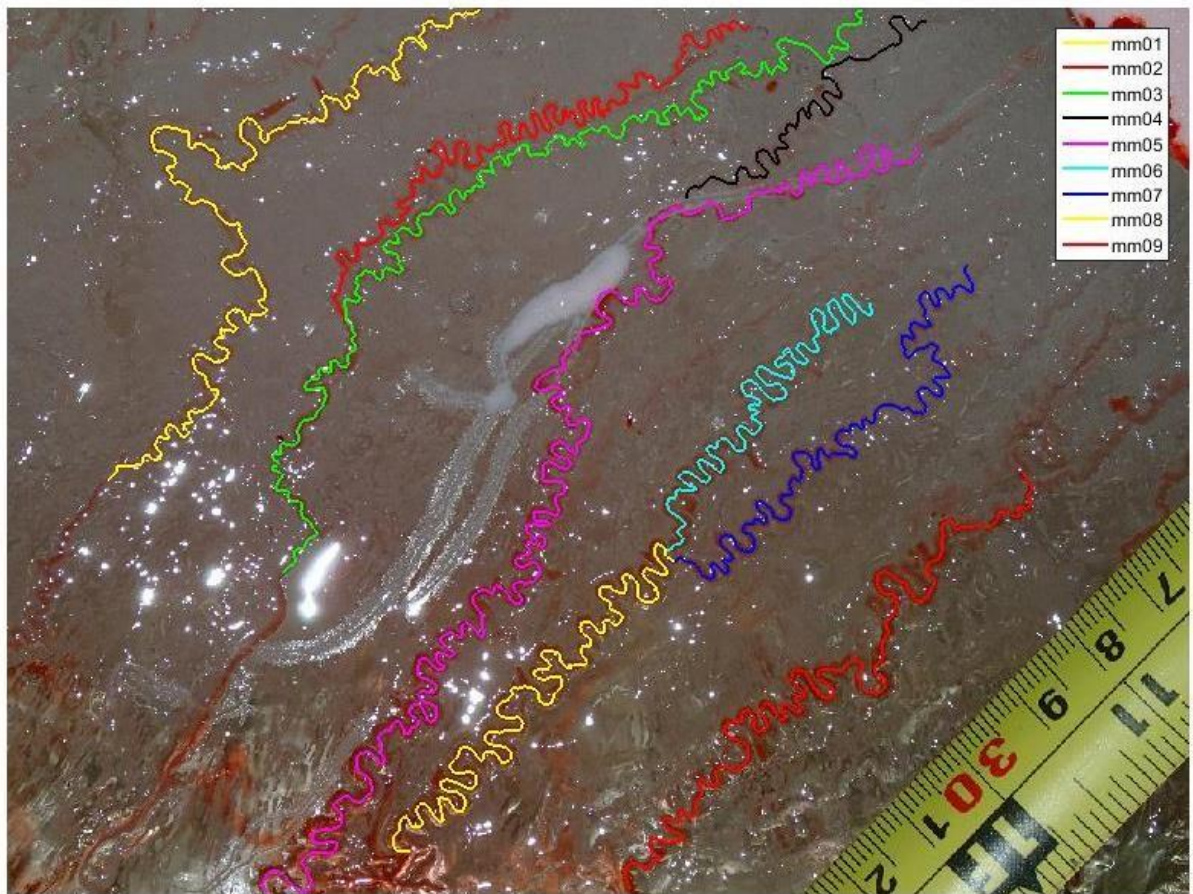

Figure S2.1. First set of mm-scale digitized channel centerlines. From top-left to bottomright, channels correspond to mm01 to mm09.

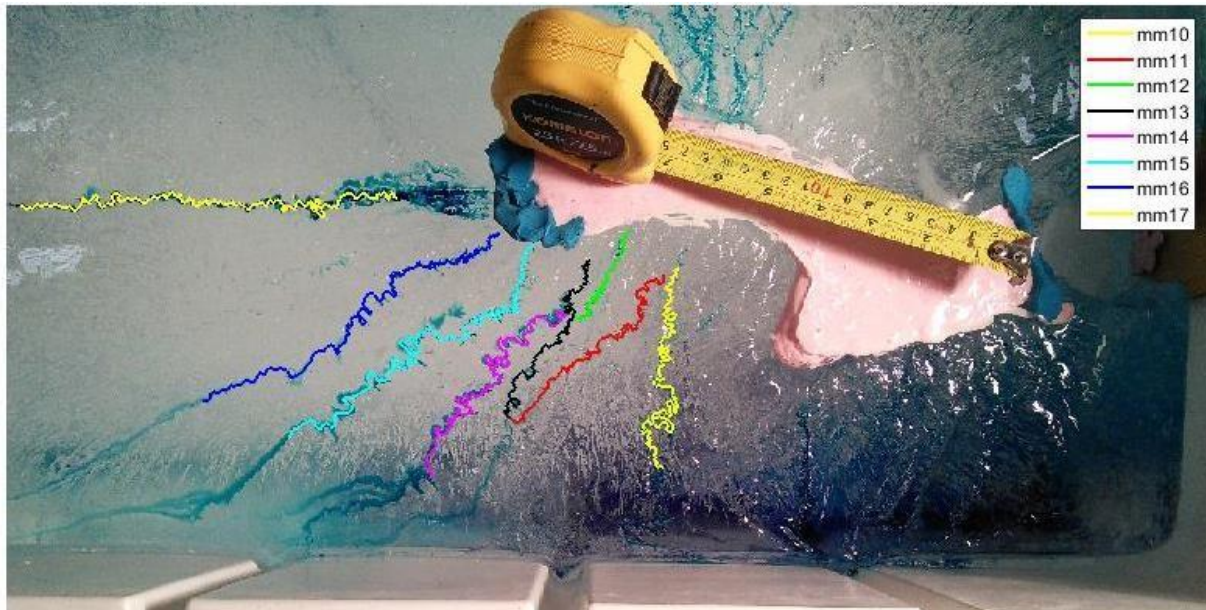

Figure S2.2. Second set of mm-scale digitized channel centerlines. From bottom-right to top-left, channels correspond to mm10 to mm17.

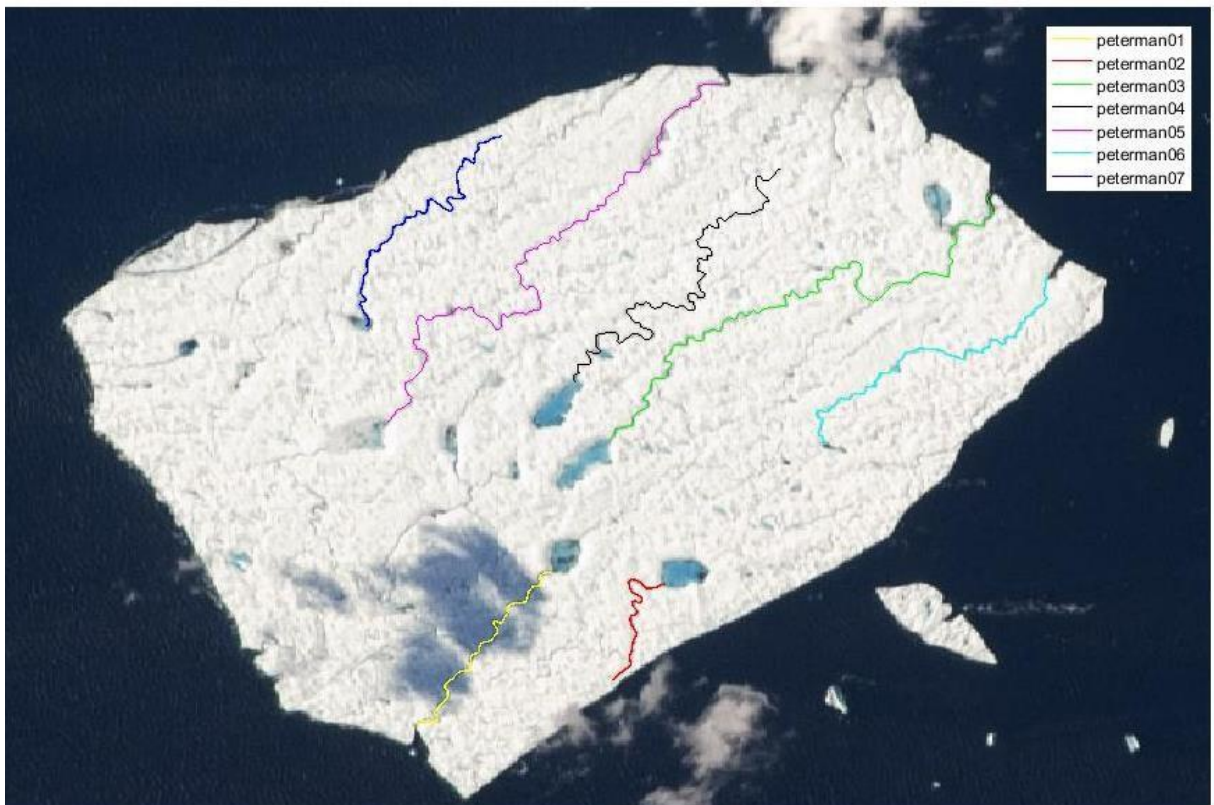

Figure S2.3. Digitized meltwater meandering channels over Peterman Ice Island. Source: ISS Crew Earth Observations experiment and Image Science & Analysis Laboratory, Johnson Space Center.

Centimeter-scale meandering rivulet images used  
for planform evolution analysis

Roberto Fernández

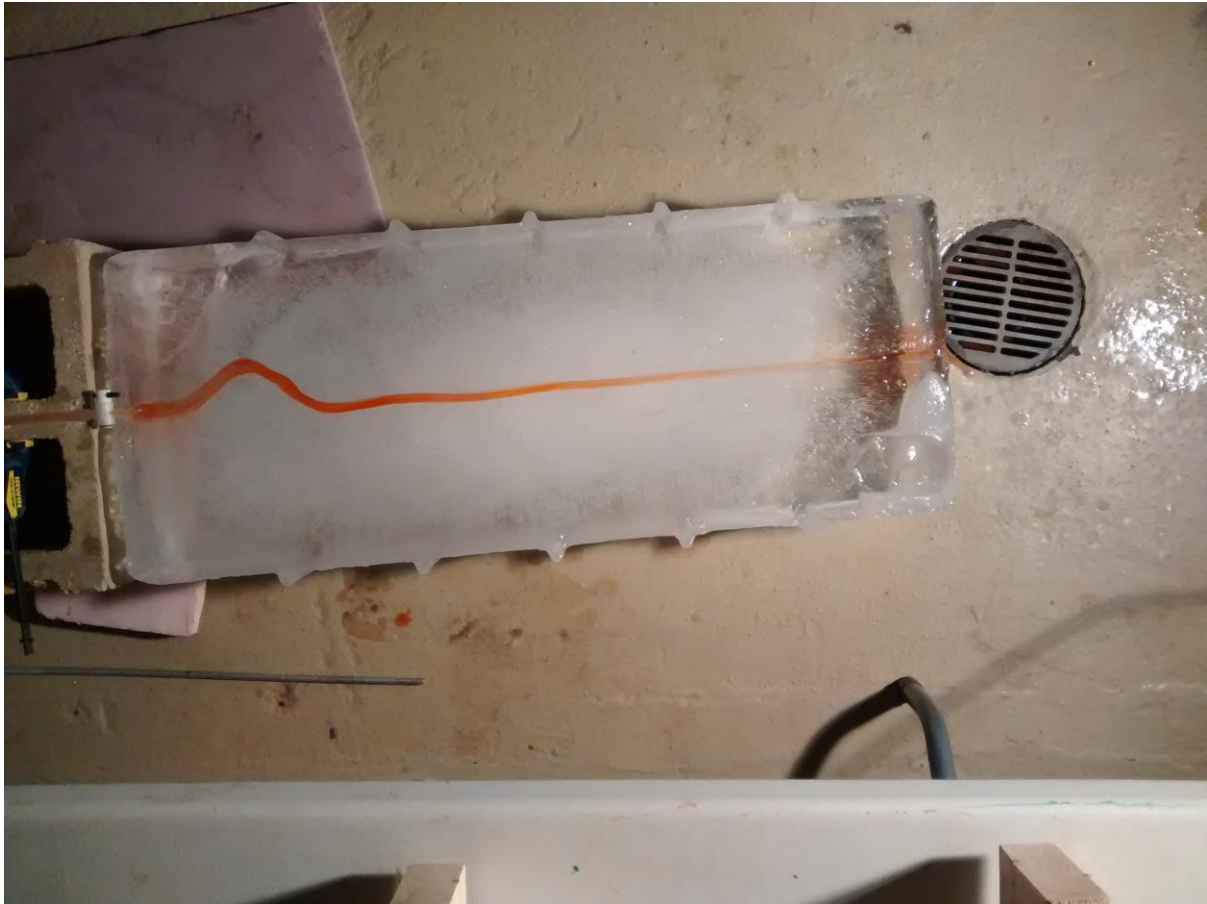

Run 01 –  $t = 0$  min

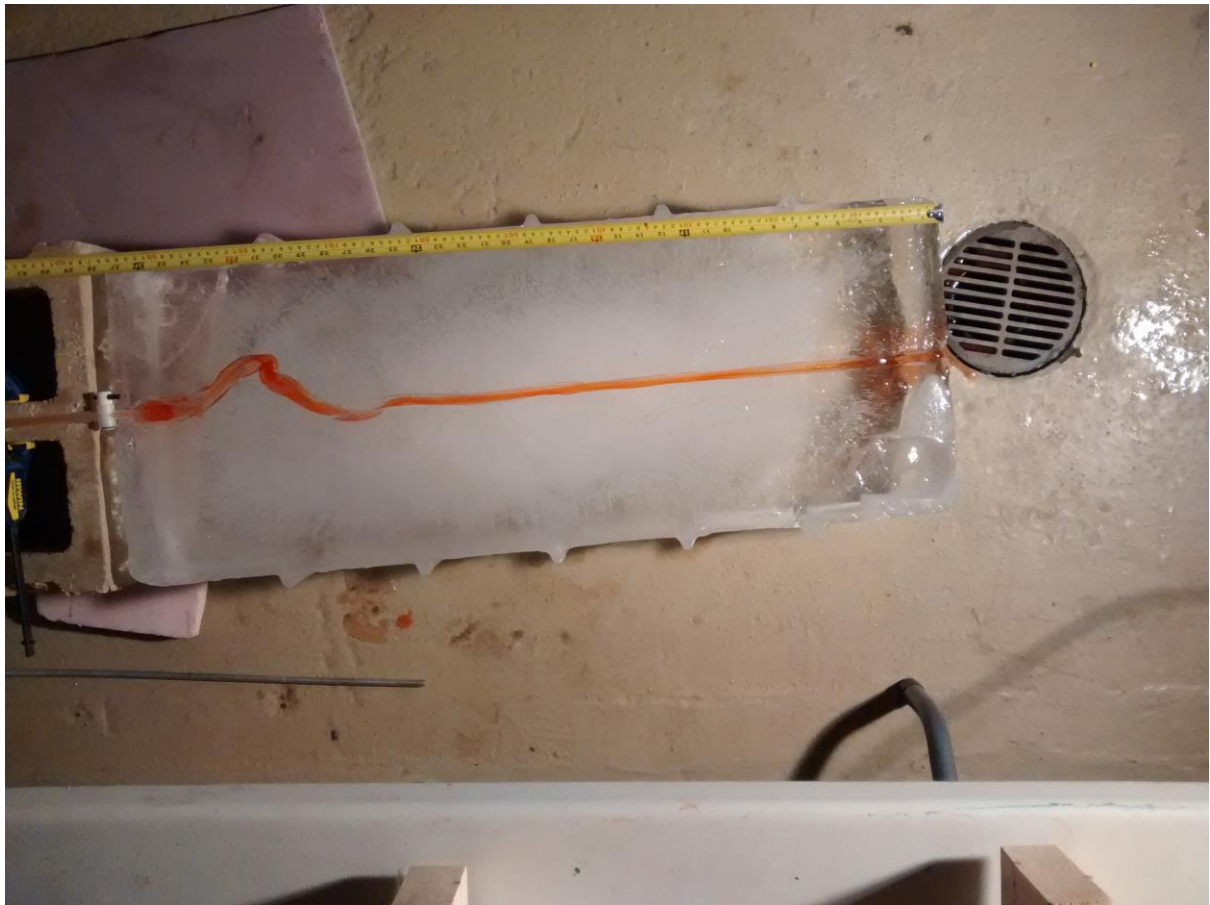

Run 01 –  $t = 7$  min

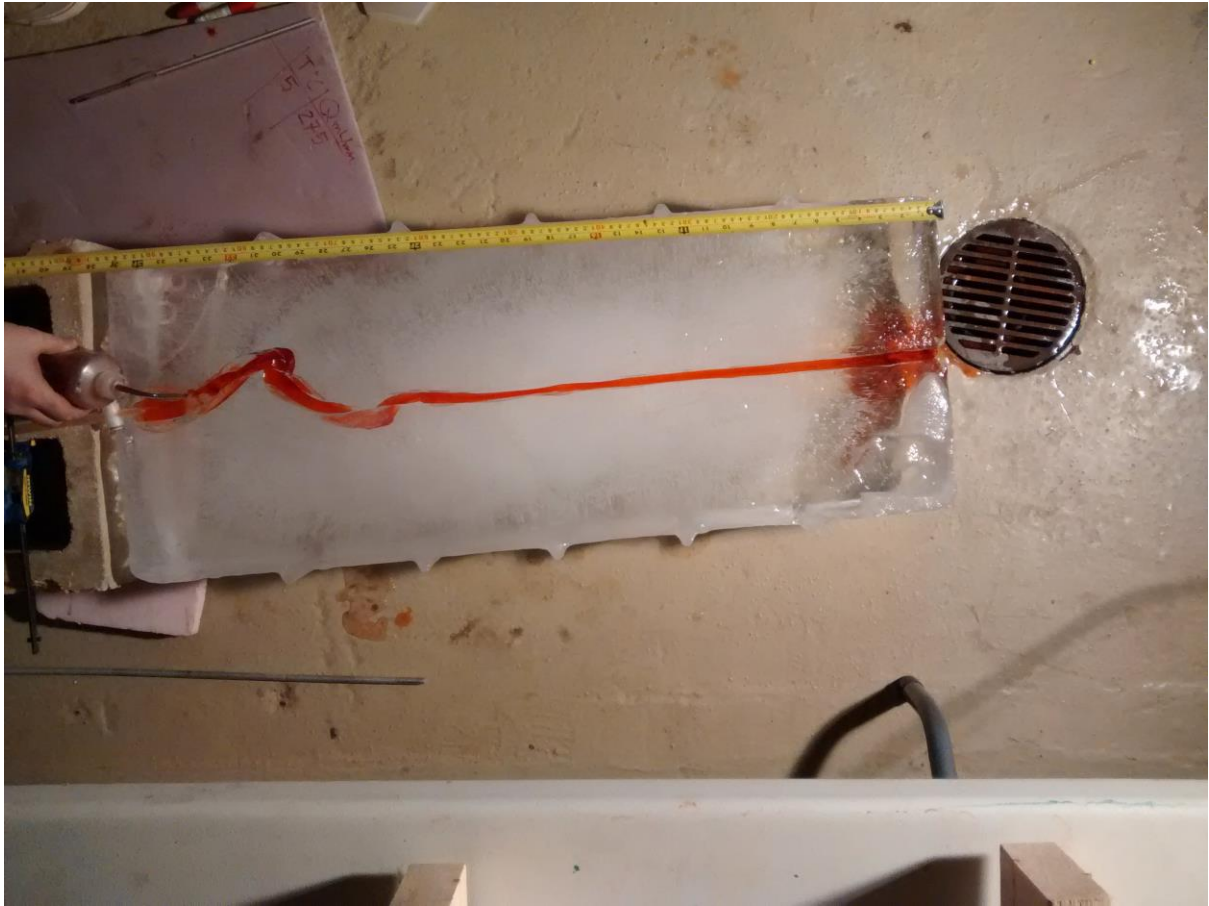

Run 01 –  $t = 20$  min

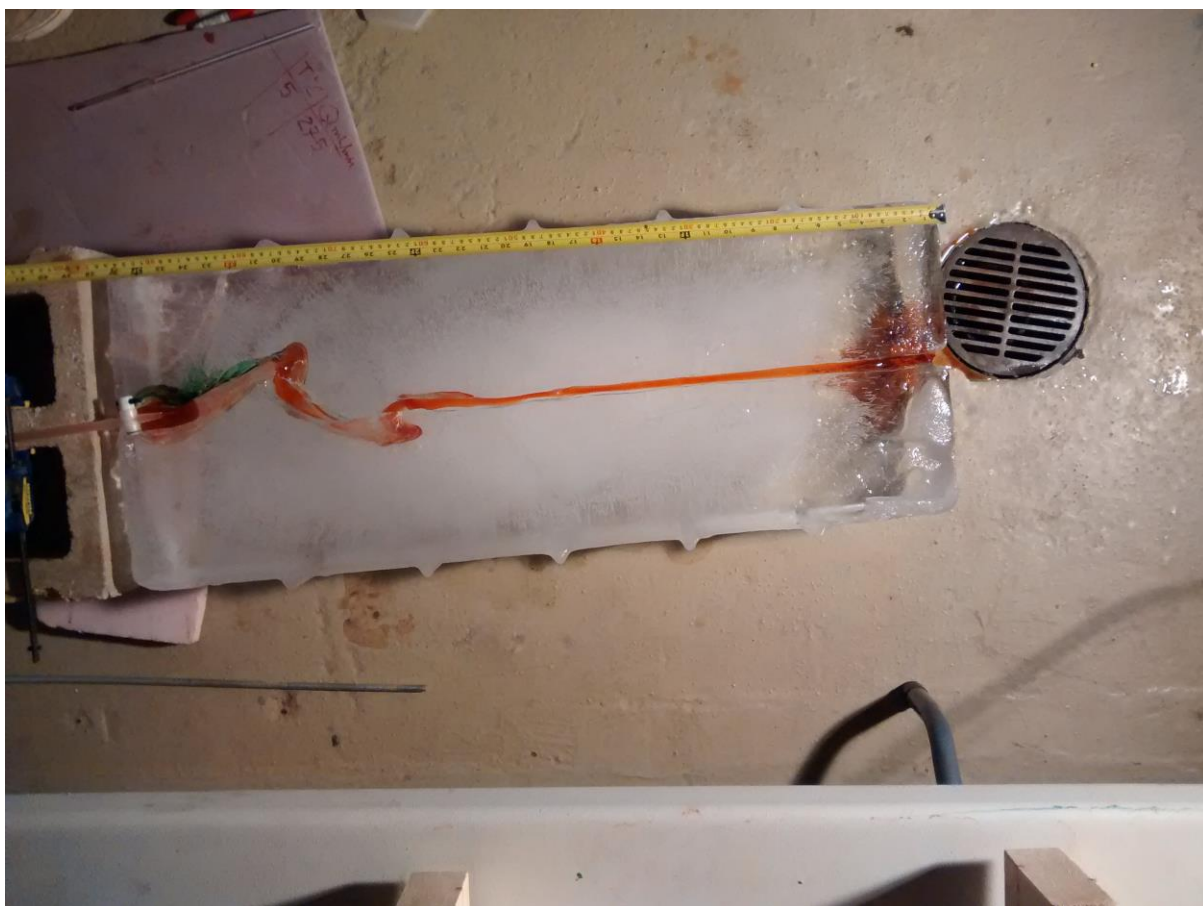

Run 01 –  $t = 35.5$  min

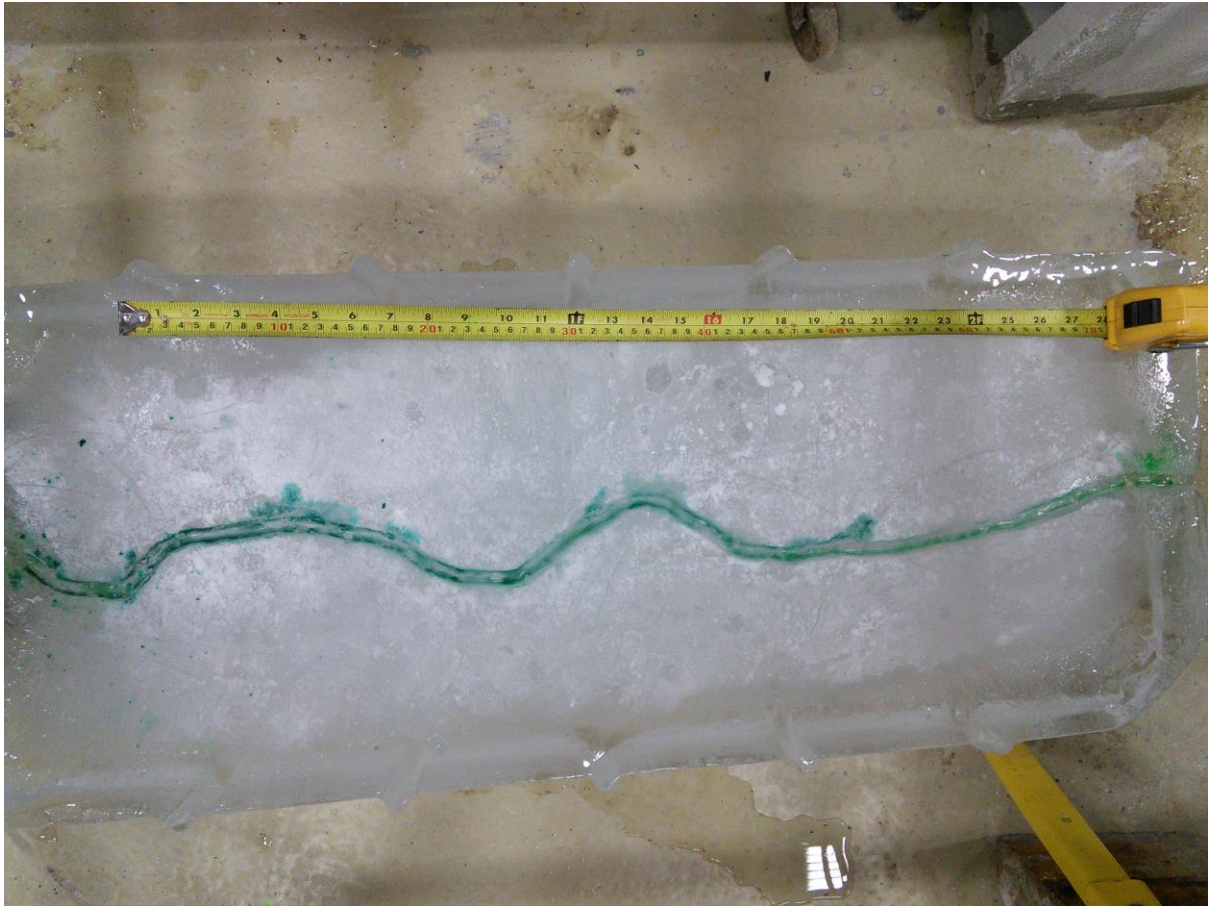

Run 02 –  $t = 0$  min

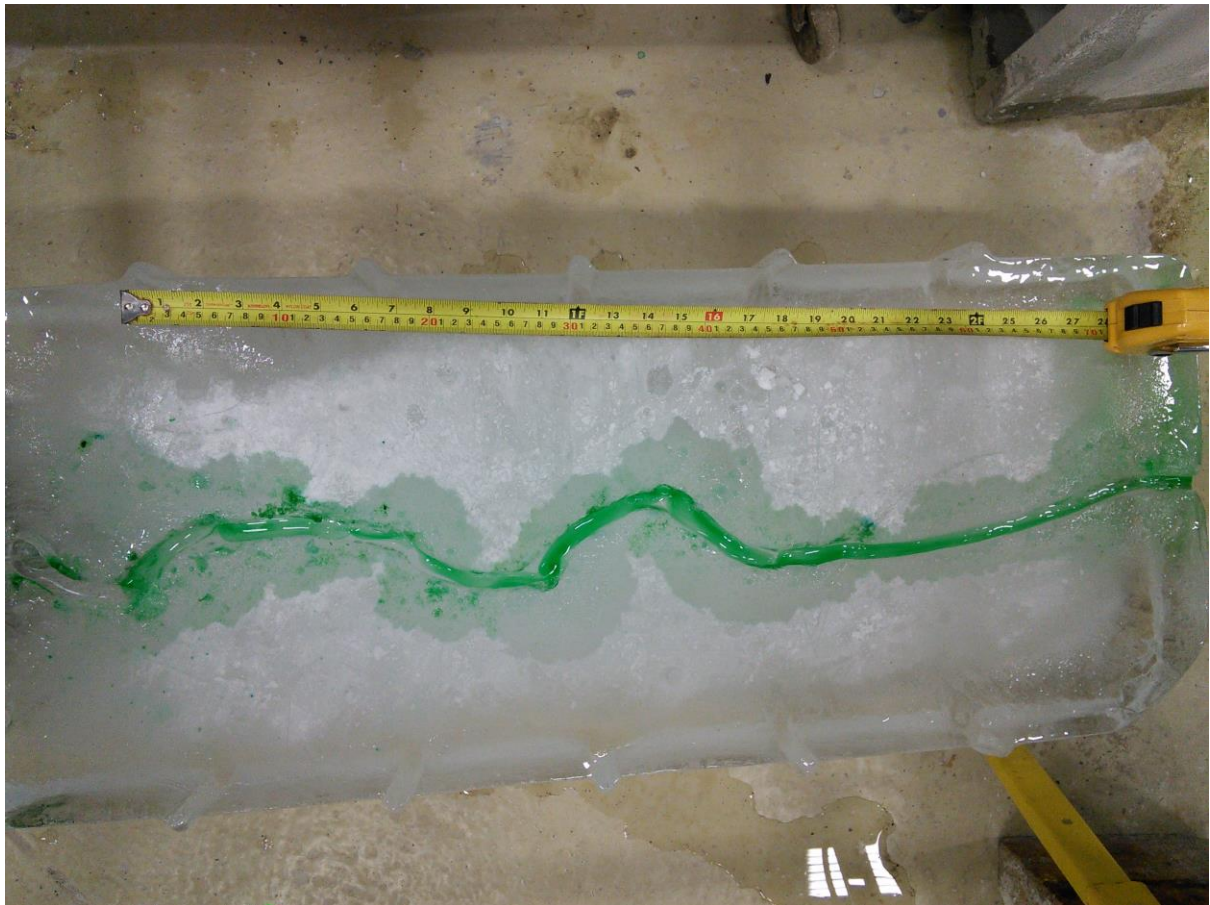

Run 02 –  $t = 4.6$  min

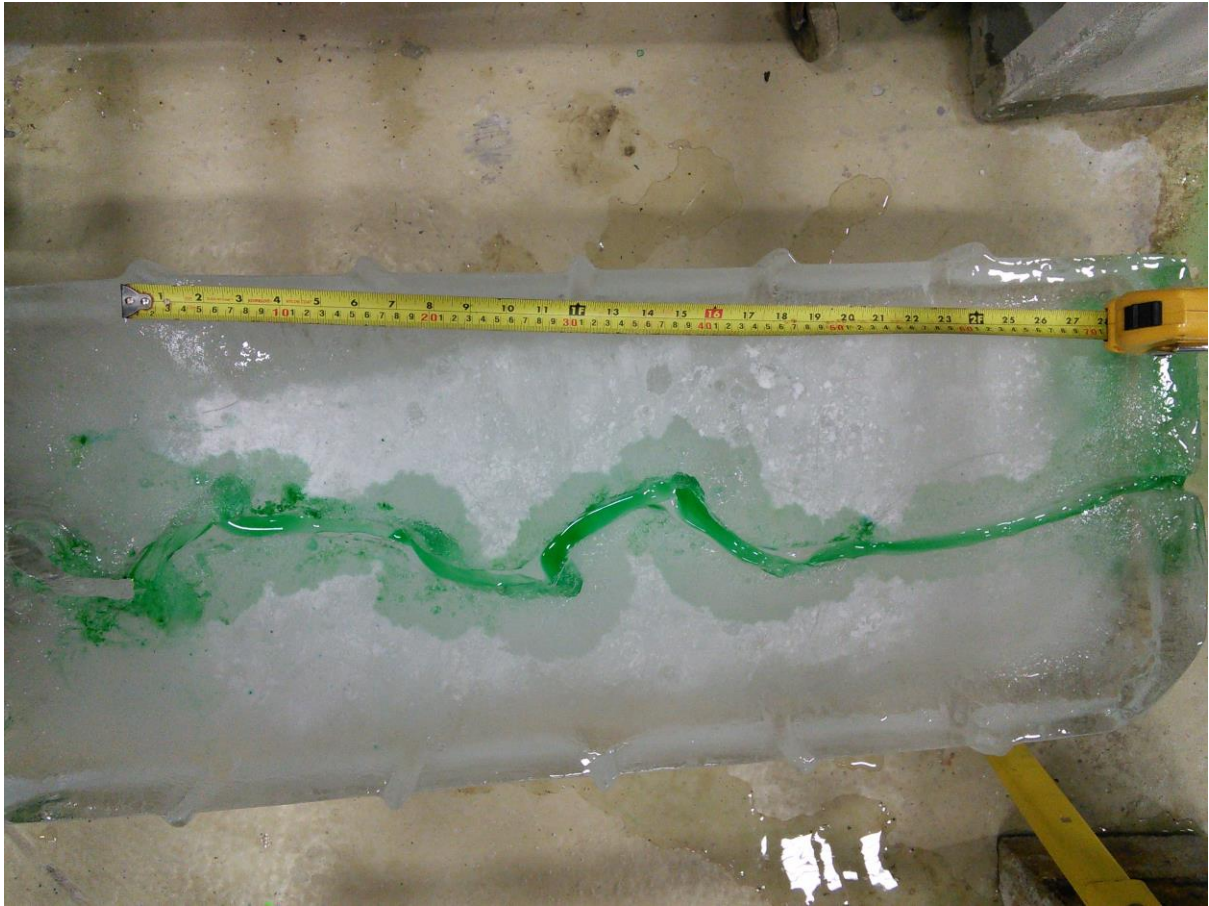

Run 02 –  $t = 9.8$  min

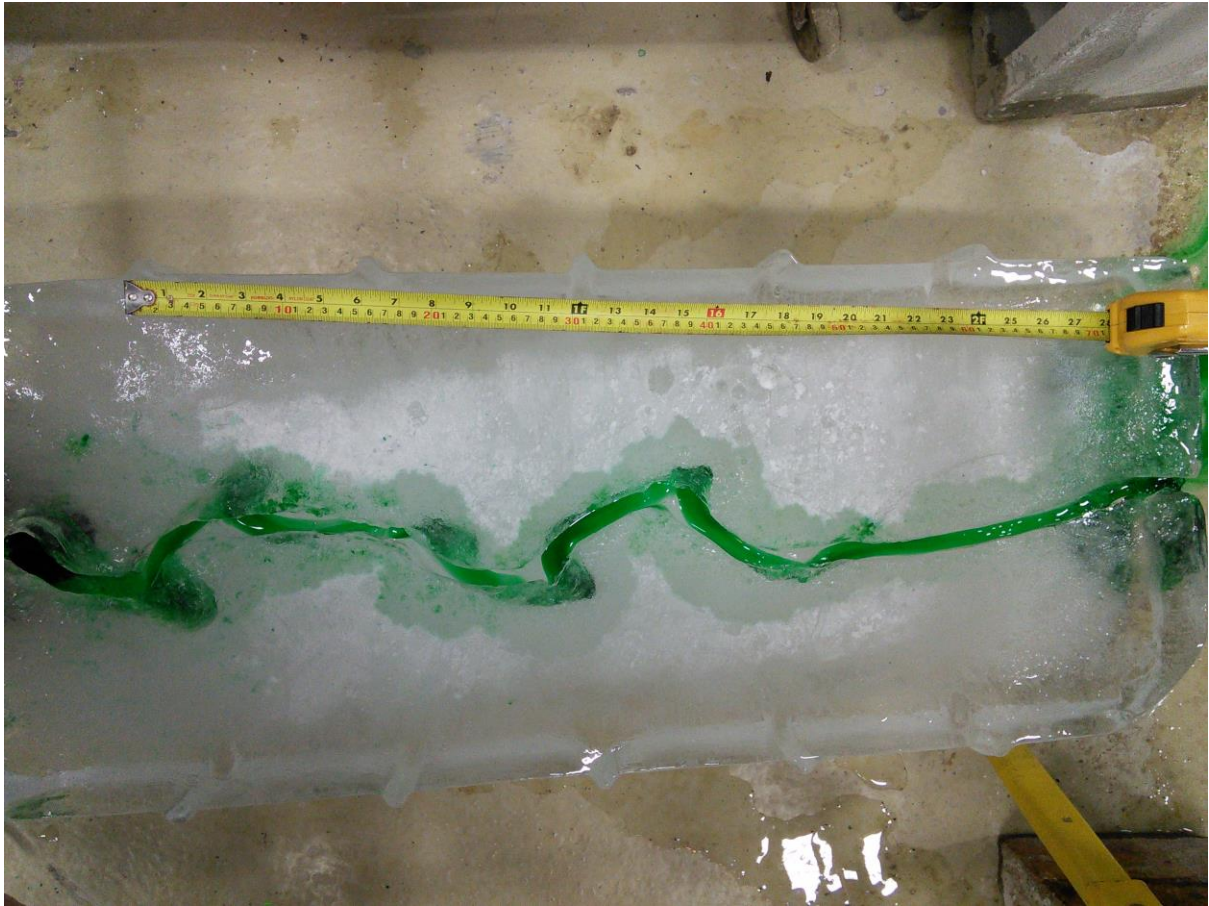

Run 02 –  $t = 12.4$  min

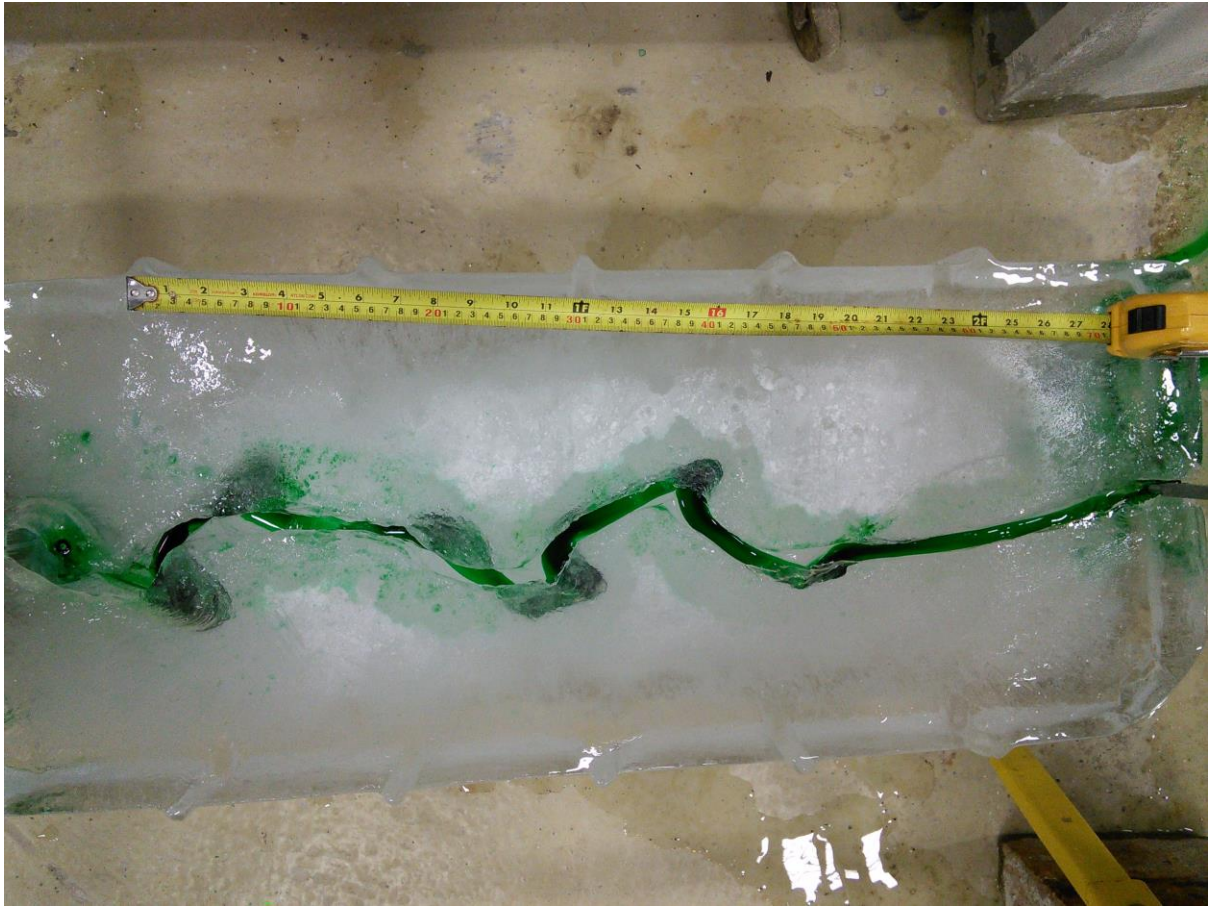

Run 02 –  $t = 14.4$  min

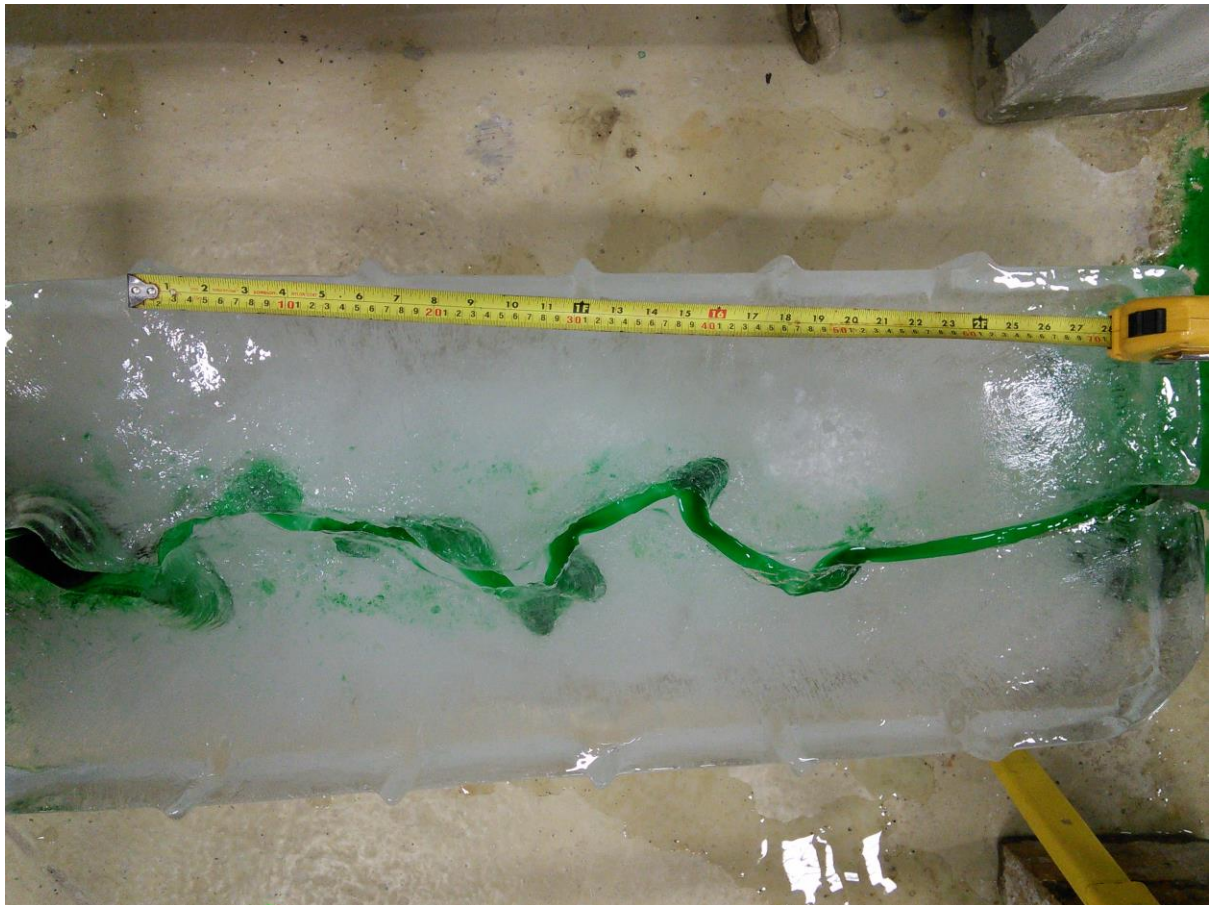

Run 02 –  $t = 18.8$  min

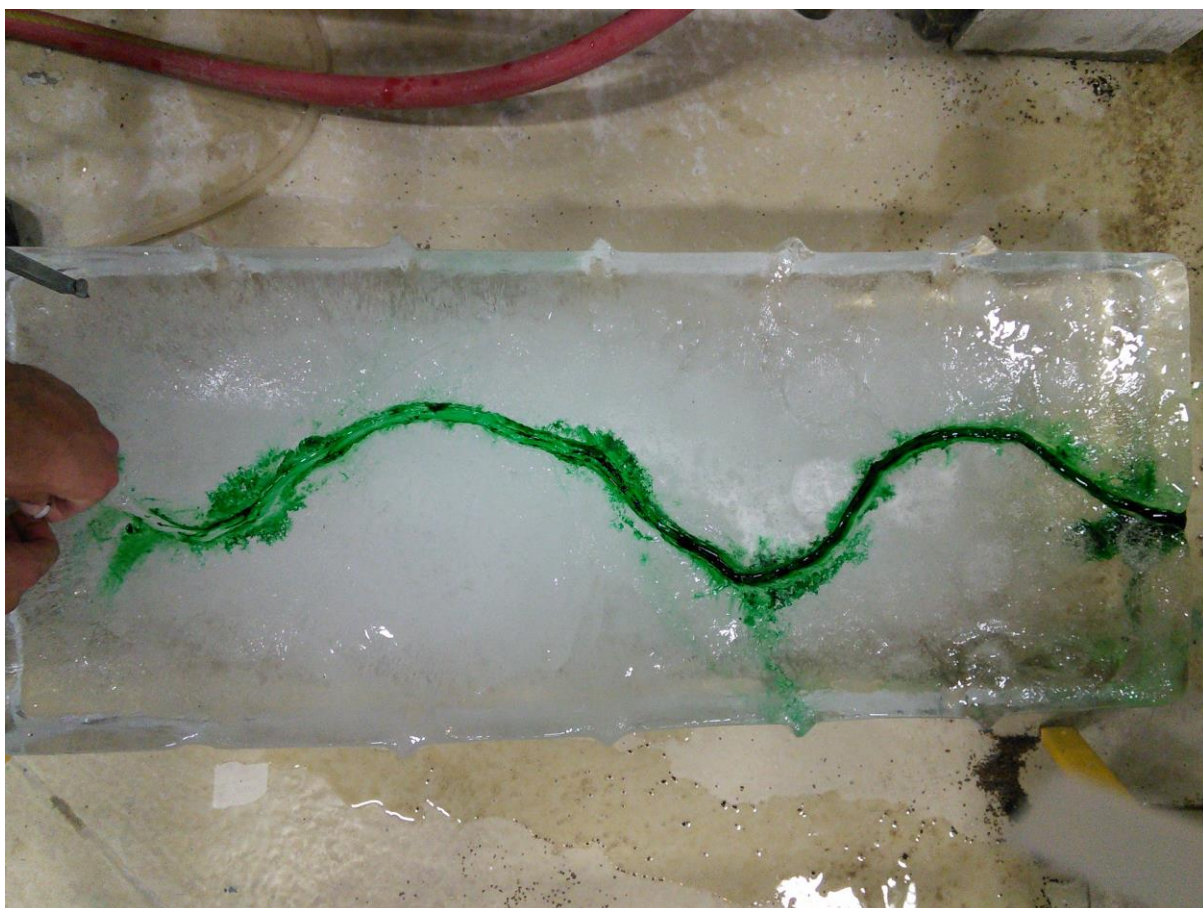

Run 03 –  $t = 0$  min

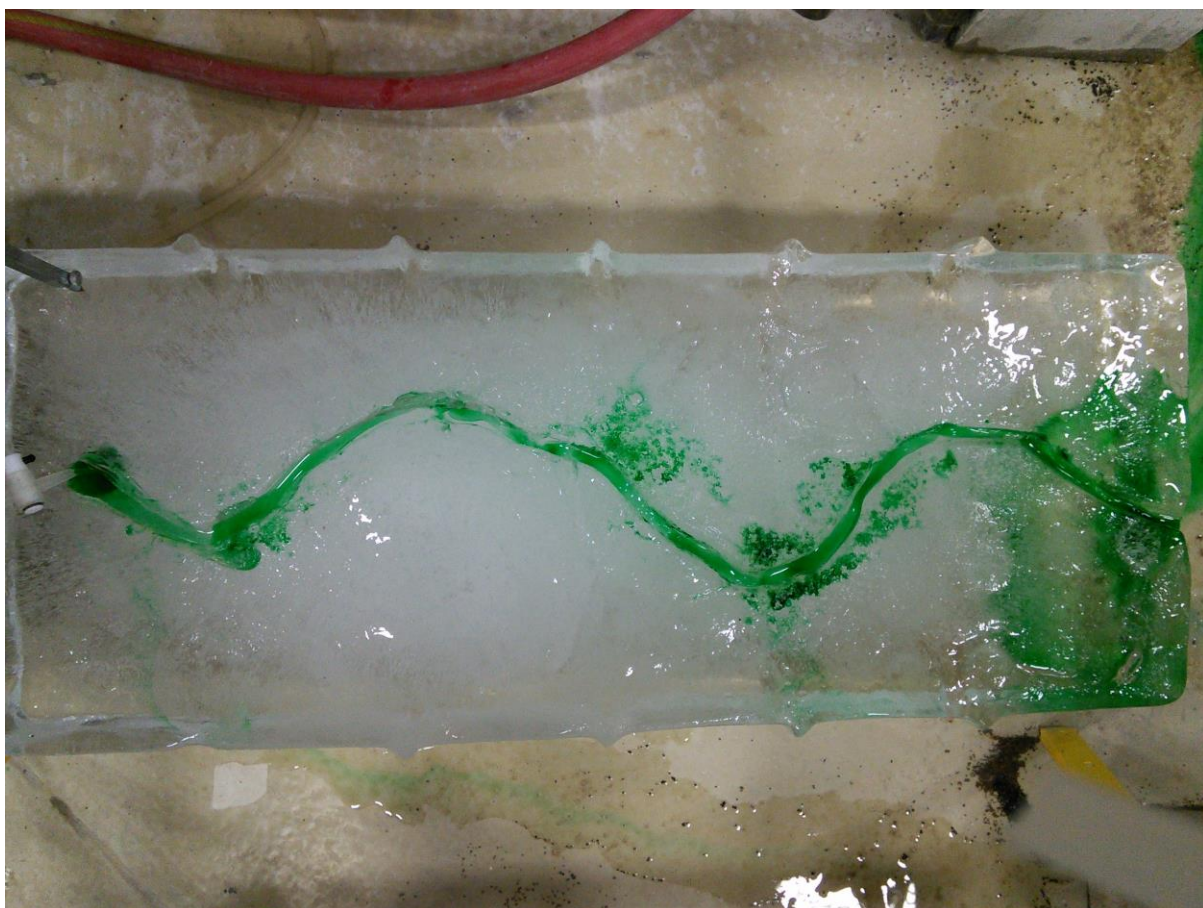

Run 03 –  $t = 4.7$  min

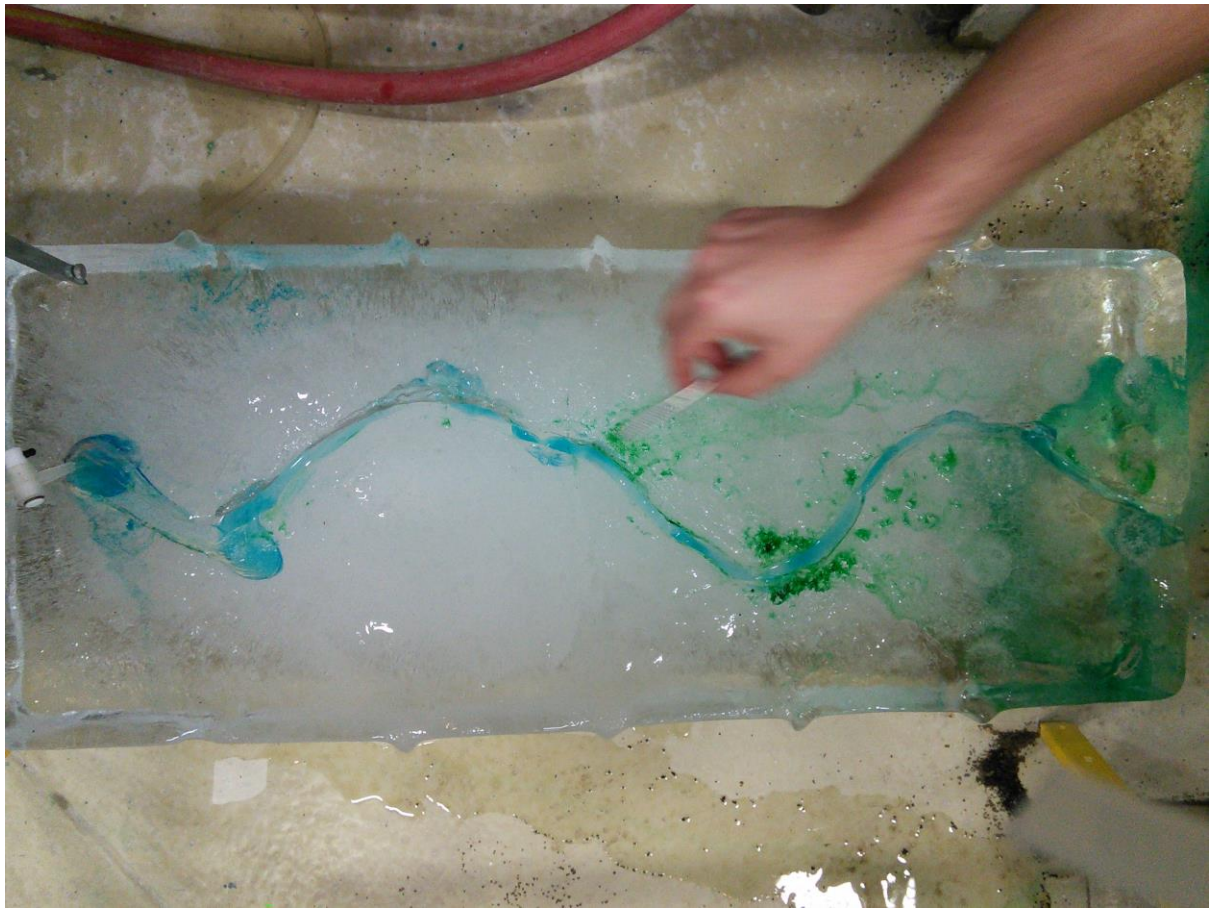

Run 03 –  $t = 10.5$  min

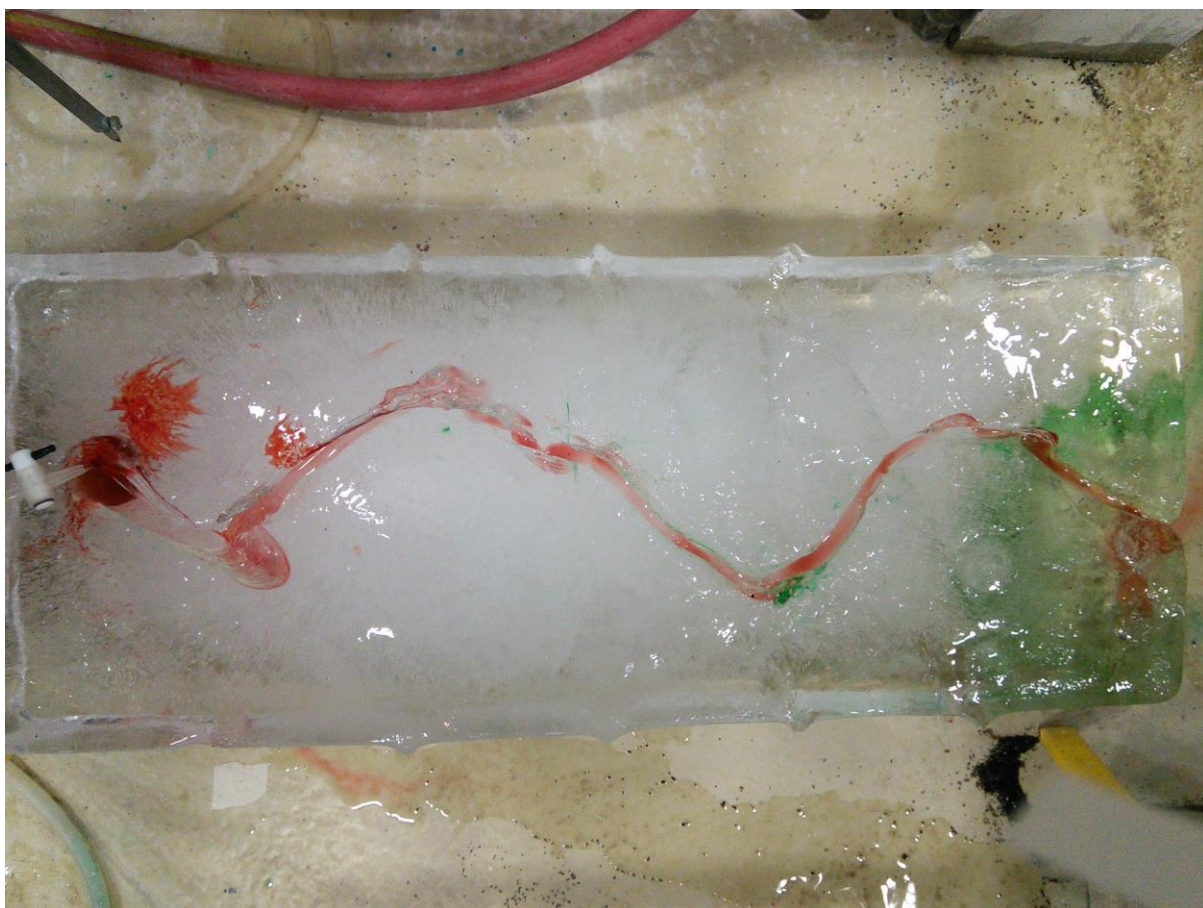

Run 03 –  $t = 15.2$  min

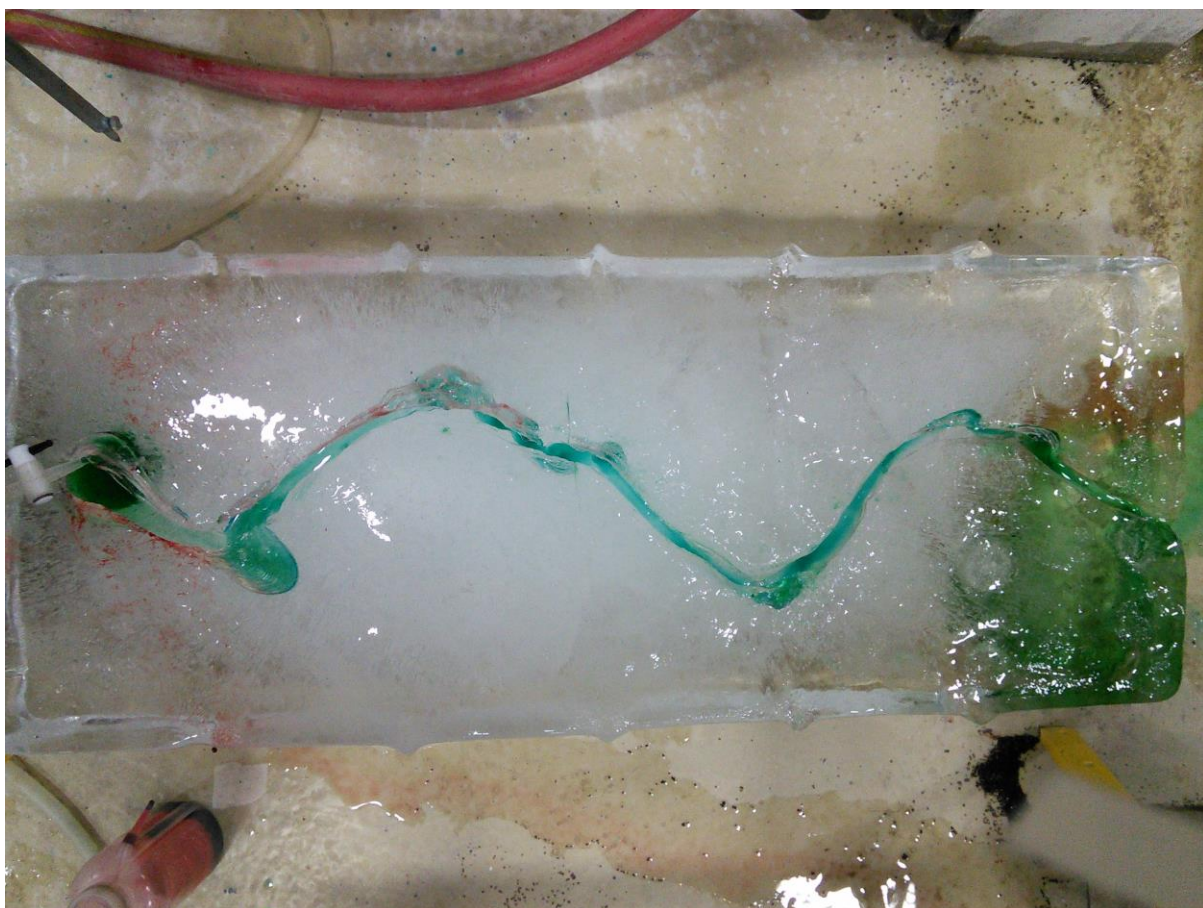

Run 03 –  $t = 21.6$  min

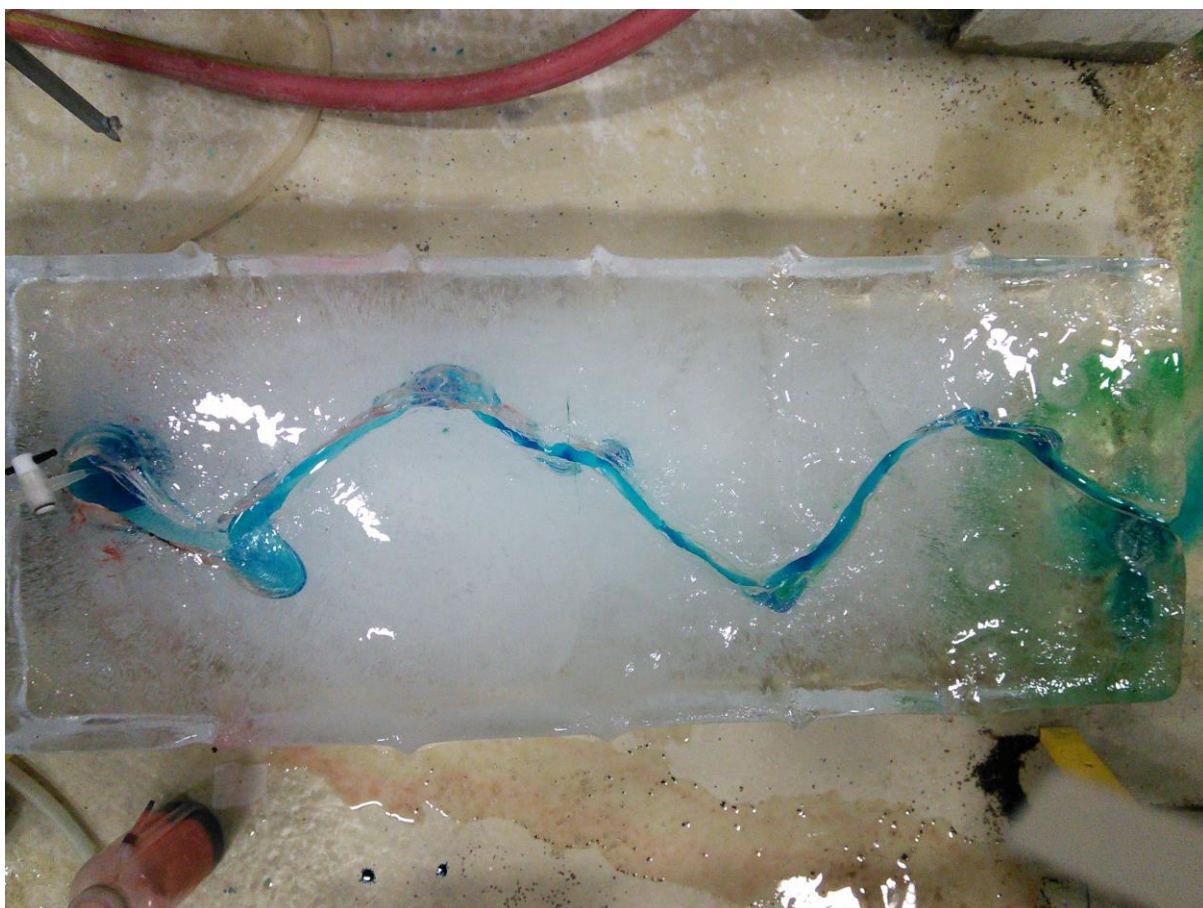

Run 03 –  $t = 28.8$  min

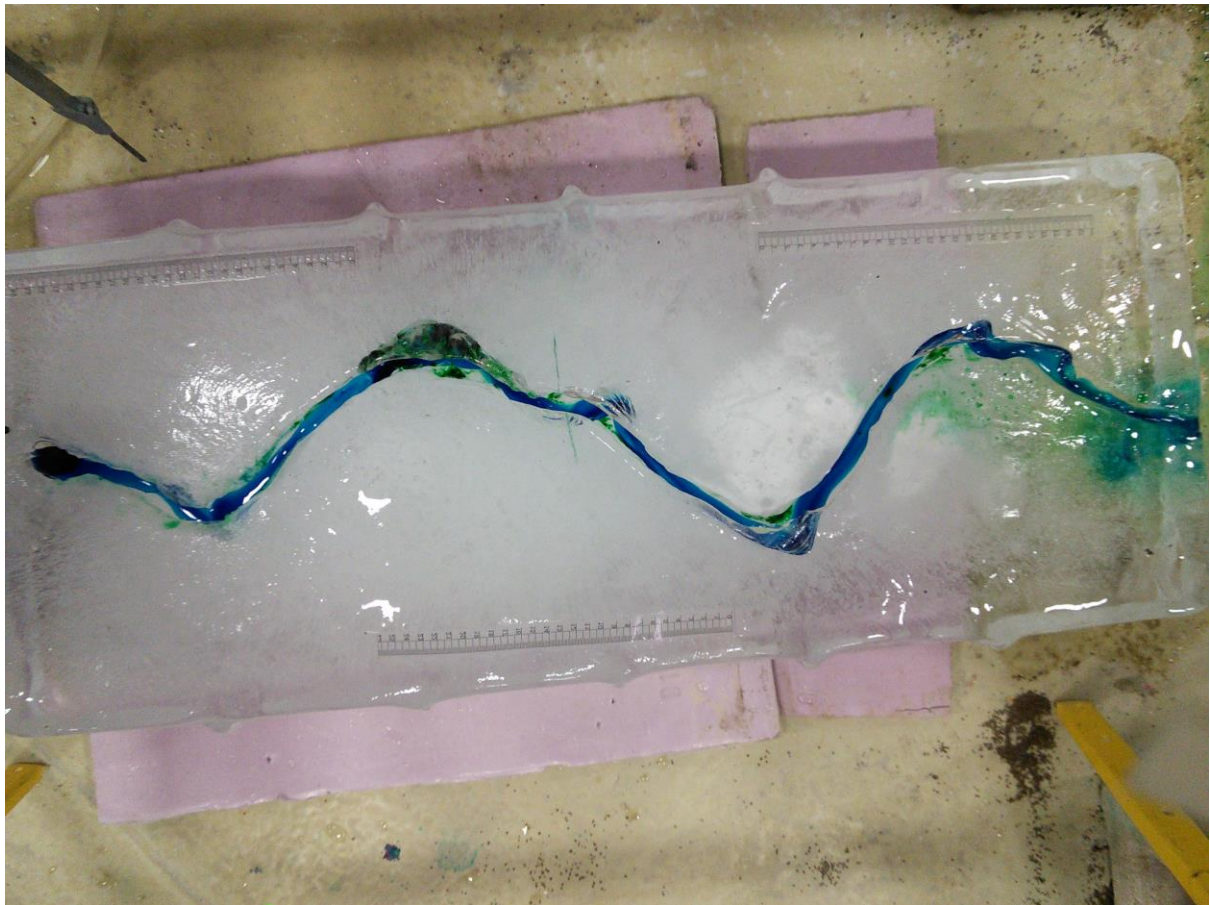

Run 04 –  $t = 4$  min

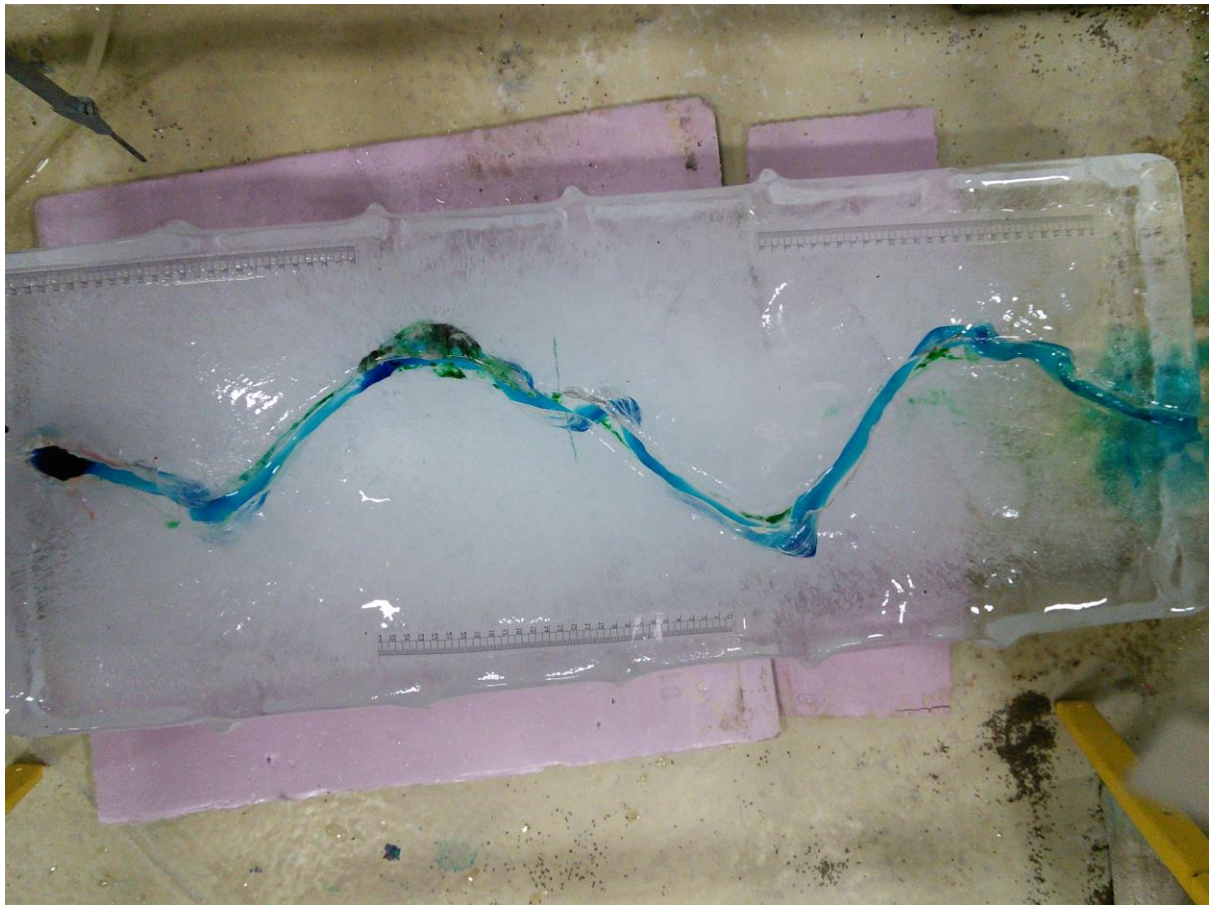

Run 04 –  $t = 7.7$  min

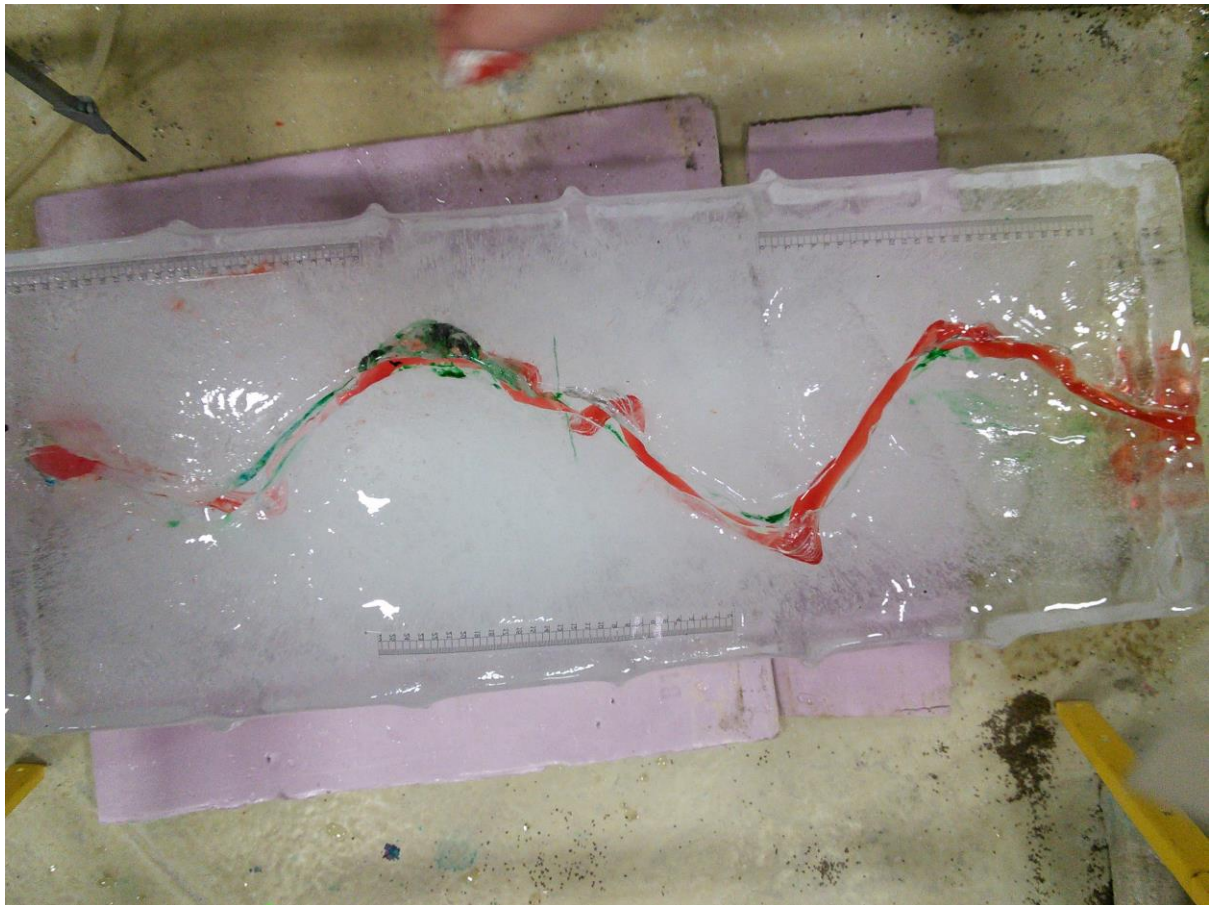

Run 04 –  $t = 11.1$  min

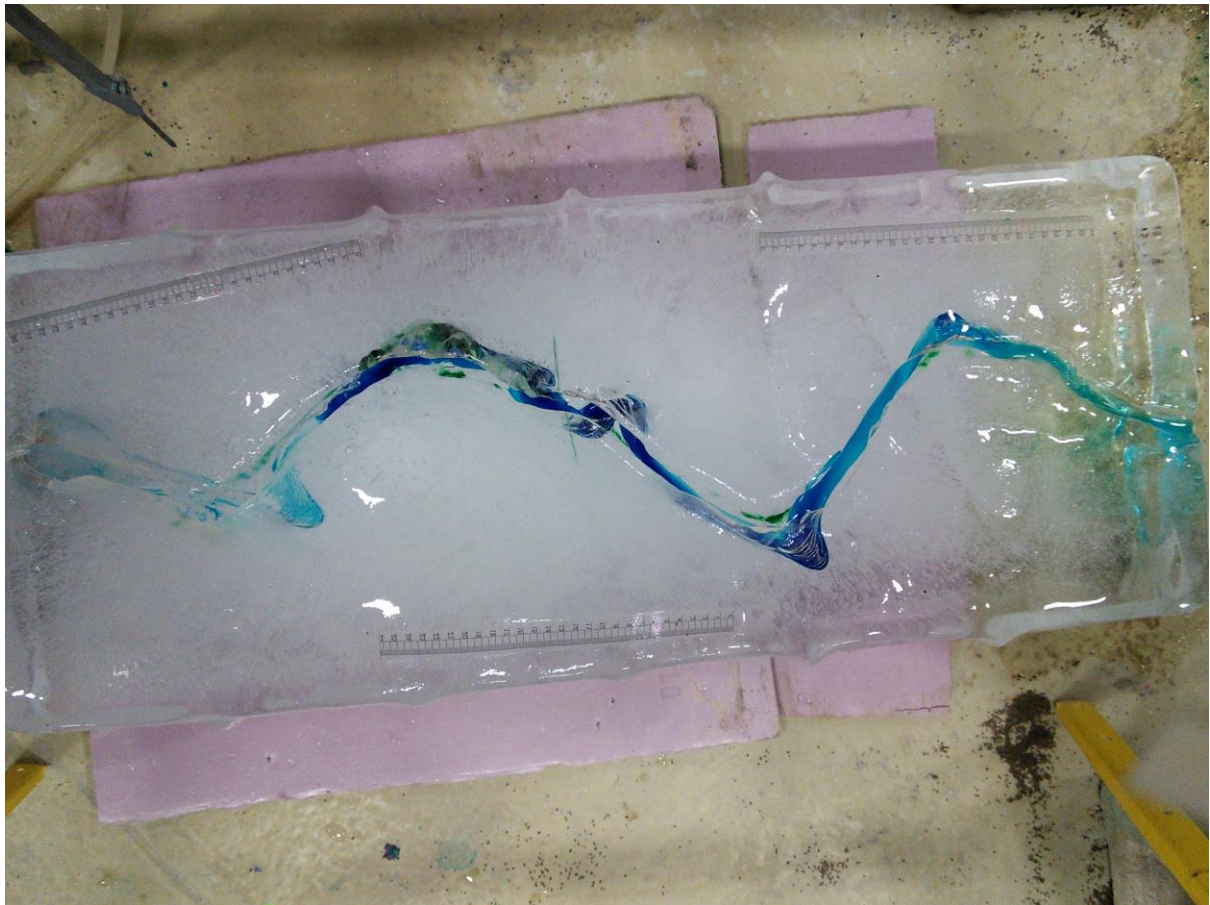

Run 04 –  $t = 14.4$  min

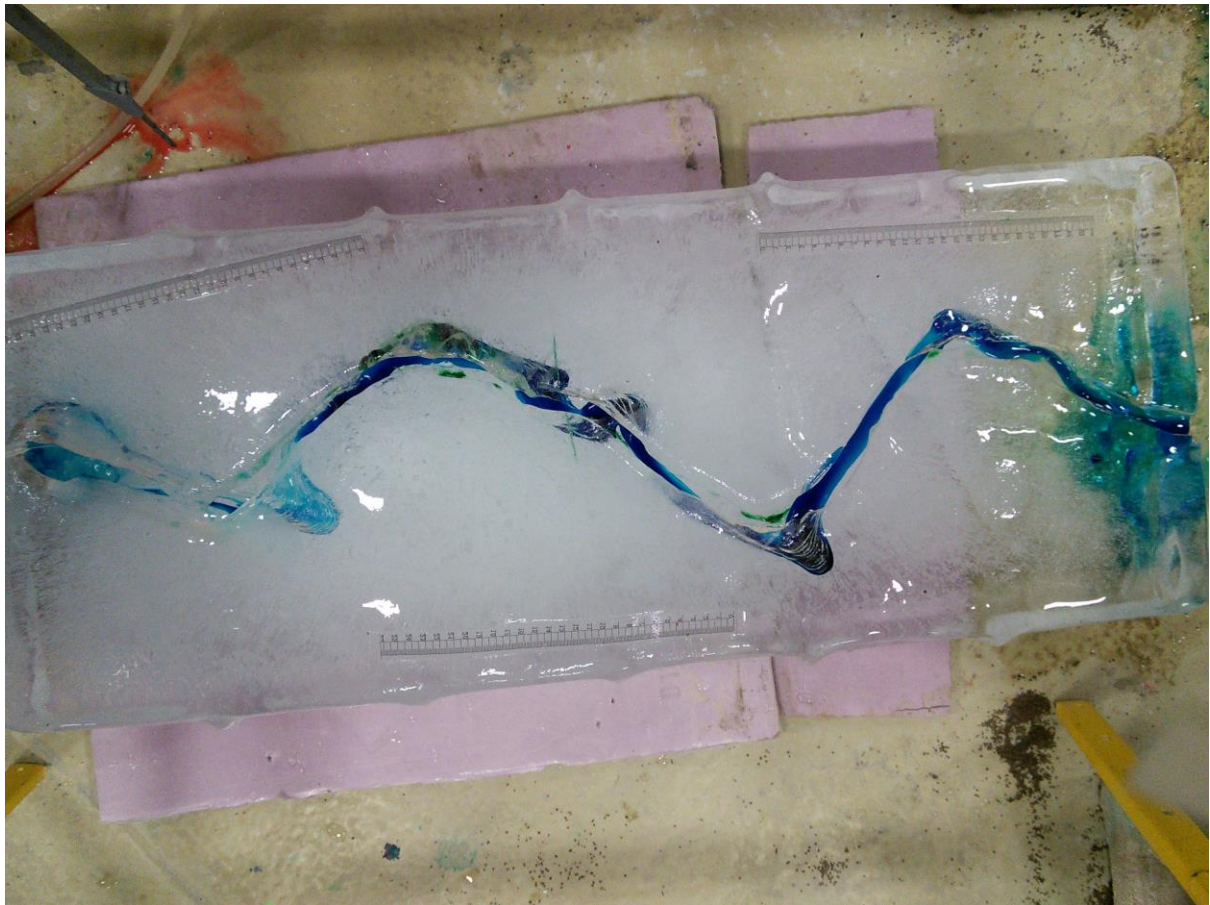

Run 04 –  $t = 18.8$  min

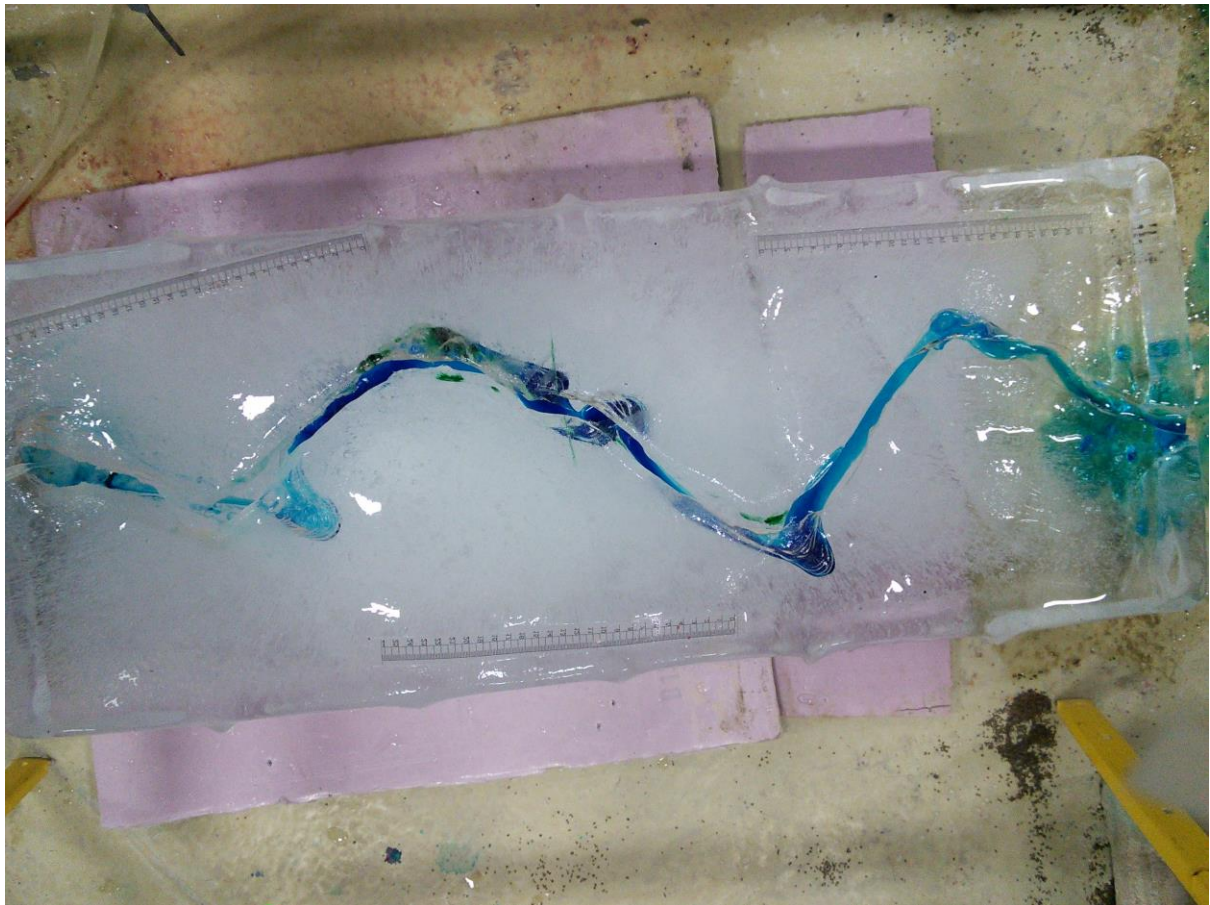

Run 04 – 21.4 min

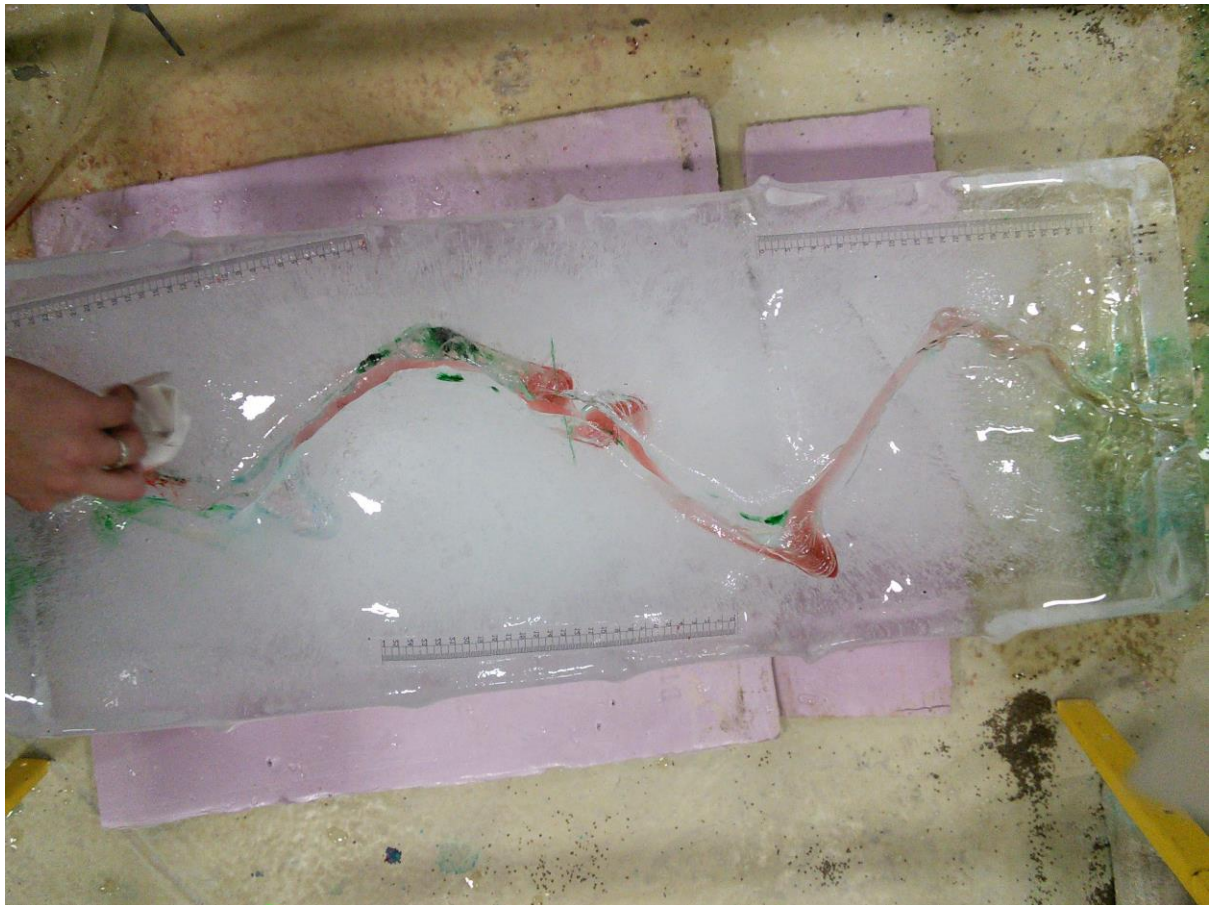

Run 04 –  $t = 24.1$  min

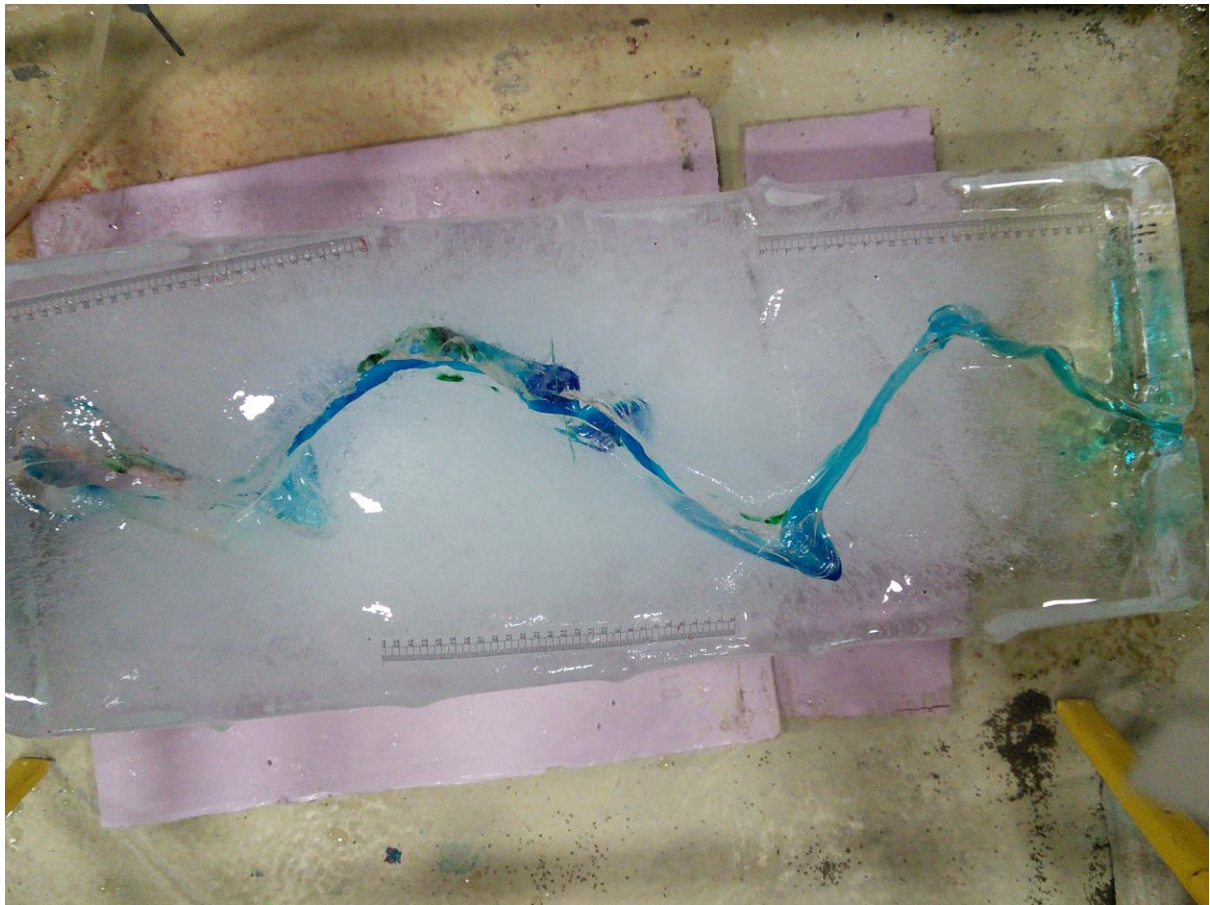

Run 04 –  $t = 27.1$  min

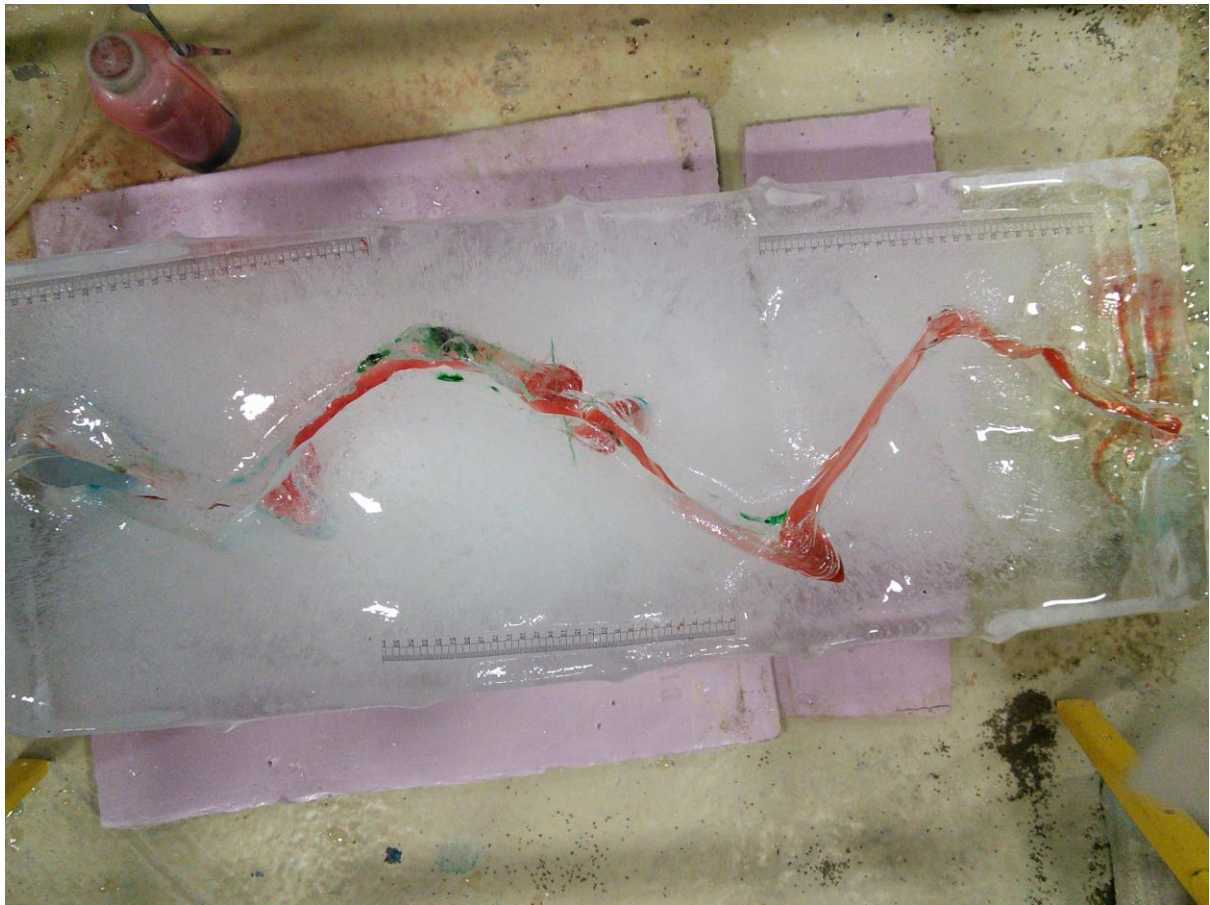

Run 04 –  $t = 28.8$  min
